# Supplementary material for: Evaluation of correlated Pandora column observations and in situ surface air quality measurements during GMAP campaign
Source: Copernicus journal article supplement (doi:10.5194/acp-2022-170), 2022-04-25
Supplement: Supplementary file 1 [file acp-2022-170-supplement-version2.pdf]

*Supplementary Material of*

**Evaluation of correlated Pandora column NO<sub>2</sub> and *in situ* surface NO<sub>2</sub>  
measurements during GMAP campaign**

Lim-Seok Chang<sup>1</sup>, Donghee Kim<sup>1</sup>, Hyunkee Hong<sup>1</sup>, Deok-Rae Kim<sup>1</sup>, Jeonga Yu<sup>1</sup>,

Kwangyul Lee<sup>1</sup>, Hanlim Lee<sup>2</sup>, Daewon Kim<sup>2</sup>, Jinkyu Hong<sup>3</sup>, Hyun-Young Jo<sup>4</sup>,

and Cheol-Hee Kim<sup>4,5</sup>

<sup>1</sup> *Environmental Satellite Center, National Institute of Environmental Research, Incheon, 22689, Republic of Korea*

<sup>2</sup> *Department of Spatial Information Engineering, Pukyong National University, Busan, 48547, Republic of Korea*

<sup>3</sup> *Department of Atmospheric Sciences, Yonsei University, Seoul, 03722, Republic of Korea*

<sup>4</sup> *Institute of Environmental Studies, Pusan National University, Busan, 46241, Republic of Korea*

<sup>5</sup> *Department of Atmospheric Sciences, Pusan National University, Busan, 46241, Republic of Korea*

**Table S1.** List of air quality monitoring network stations.

| Site             | Site name | Site locations |          |
|------------------|-----------|----------------|----------|
|                  |           | Long.(°E)      | Lat.(°N) |
| AQM <sub>1</sub> | Padori    | 126.1344       | 36.7382  |
| AQM <sub>2</sub> | Leewon    | 126.2805       | 36.8697  |
| AQM <sub>3</sub> | Taeon     | 126.3015       | 36.7467  |
| AQM <sub>4</sub> | Daesan    | 126.4339       | 36.9380  |
| AQM <sub>5</sub> | Seongyeon | 127.0145       | 36.7829  |
| AQM <sub>6</sub> | Dongmoon  | 126.4561       | 36.7799  |

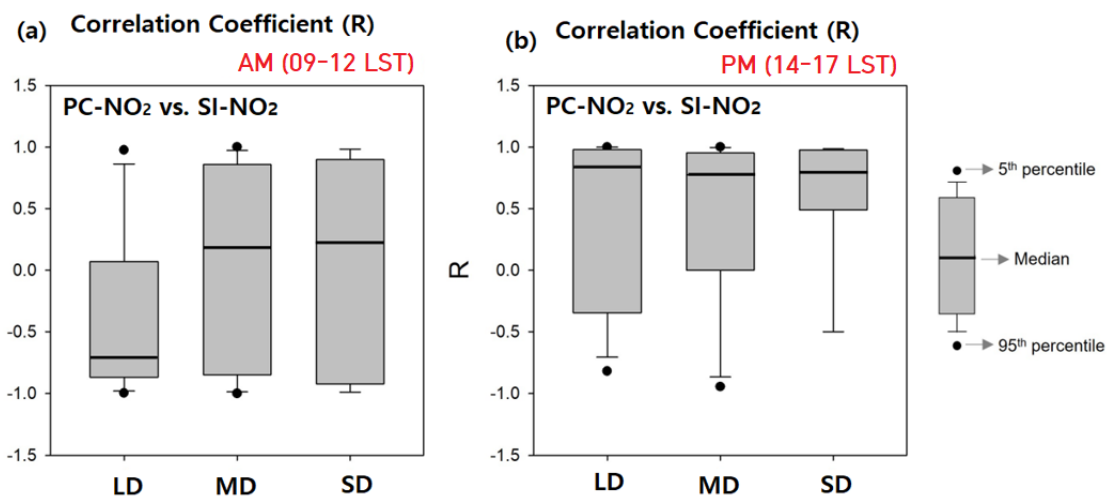

**Figure S1.** Correlation coefficients between PC-NO<sub>2</sub> vs. SI-NO<sub>2</sub> at (a)0900~1200 LST and (b)1400~1700LST, observed at Seosan during GMAP-2020 campaign.

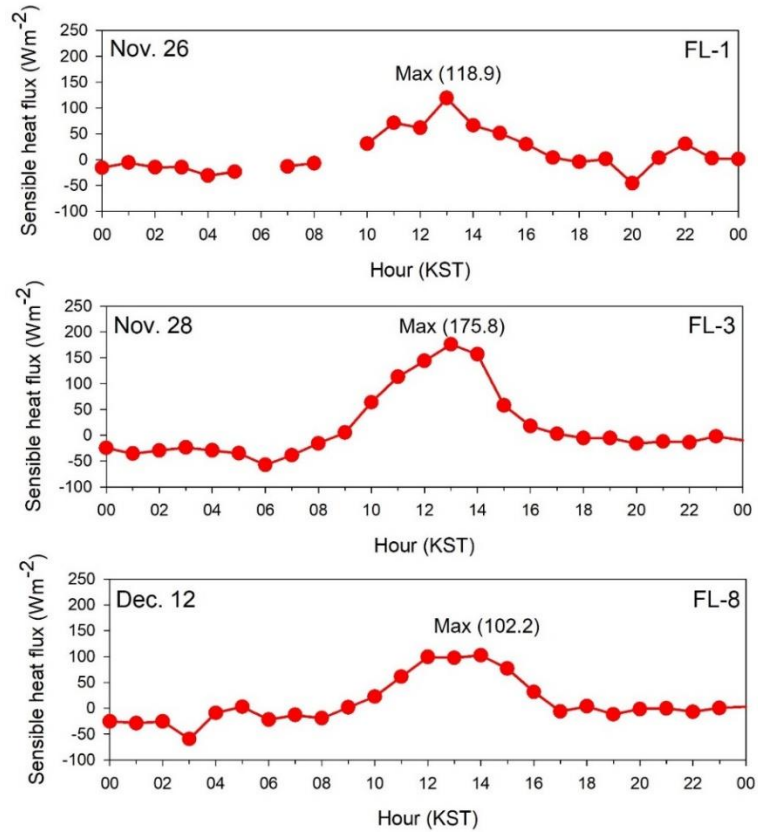

**Figure S2.** Diurnal variations of sensible heat fluxes on Nov. 26 (FL-1), Nov. 28 (FL-3), and Dec. 12(FL-8), observed at Seosan during GMAP-2020 campaign.

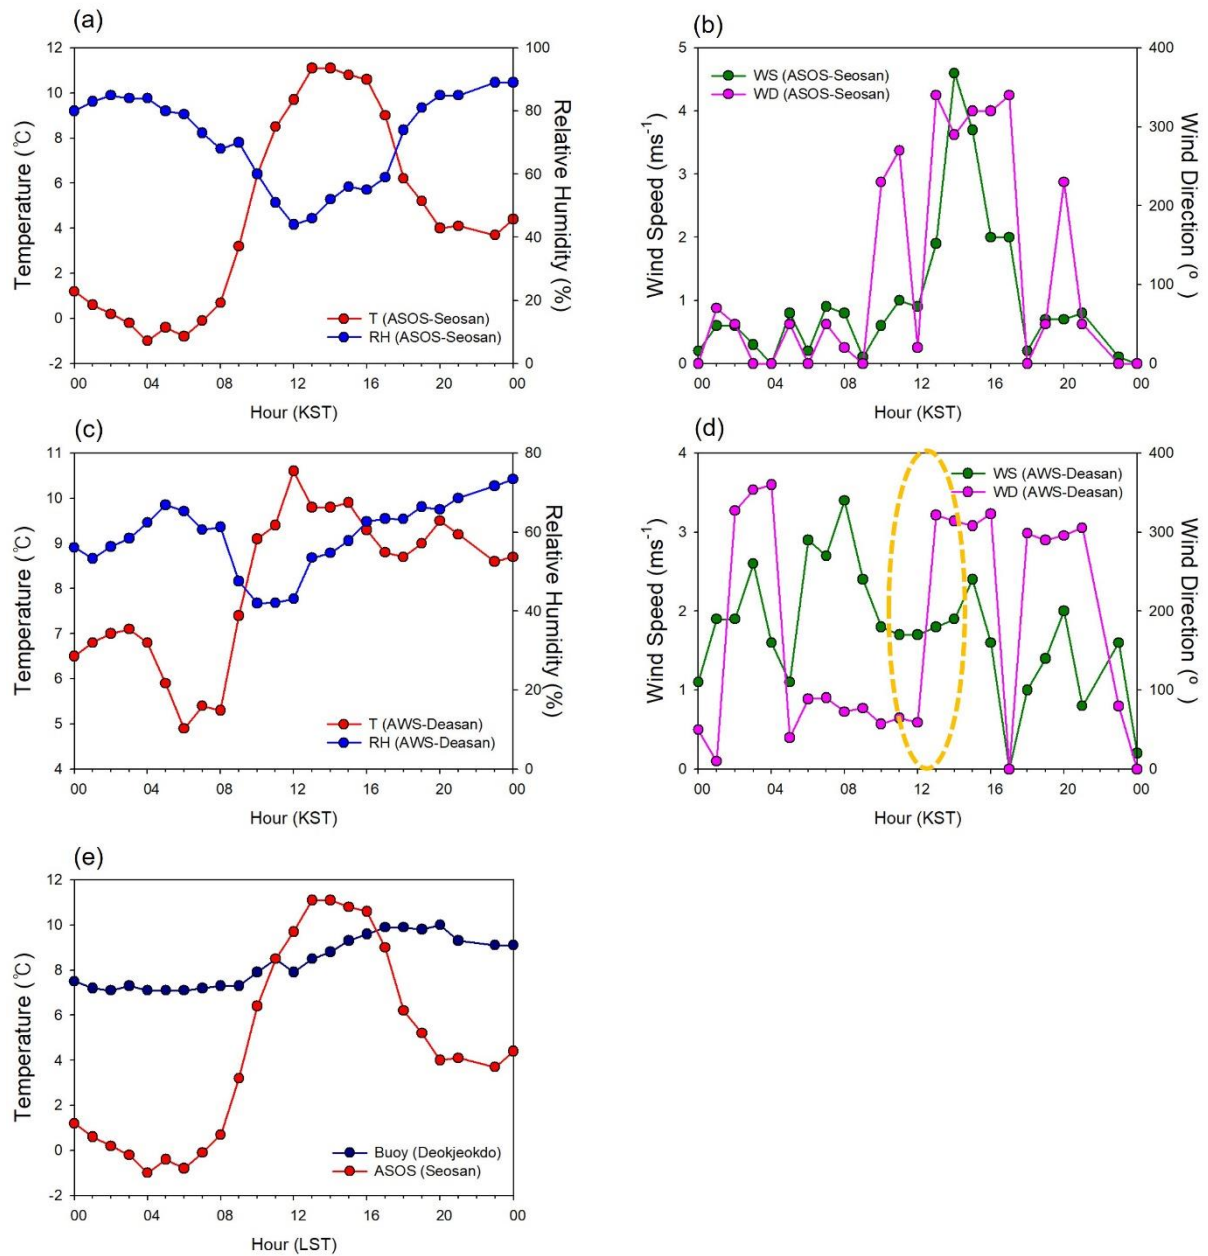

**Figure S3.** Diurnal variation of (e) Air temperature over ocean (observed at Met<sub>3</sub> site, red line) and inland (observed at Met<sub>1</sub> site, blue line), (a;d) Meteorological variables: wind speed/direction, temperature, and relative humidity, measured at two sites: Met<sub>1</sub> and Met<sub>2</sub> sites. Site locations are denoted in Figure 1.

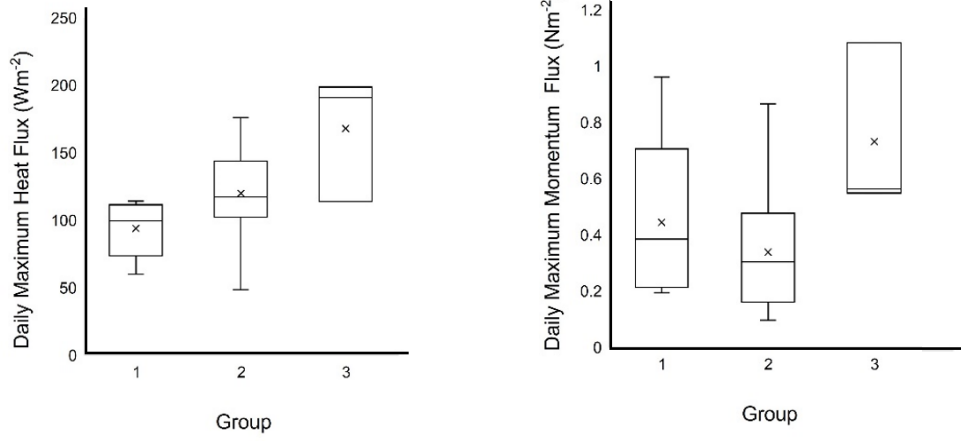

**Figure S4.** The comparison of observation-based daily maximum heat and momentum fluxes for three meteorological groups during GMAP-2020 campaign.
